# Supplementary material
Source: Springer Nature journal article supplement (https://www.springermedizin.de/resource/supplementary/13012_2008_138_MOESM1_ESM.pdf/9629442)
Supplement: MOESM1 [file 9629442]

All questions below concern the period from January till December 2007

1. **How many meetings were scheduled for your PTAM group in 2007?**

..... meetings (when 0 meetings were scheduled, this was the last question)

2. **On average, how much time was spent on each meeting?**

.....hours .....minutes

3. **Who usually prepared the meetings in 2007?**

*Choose the answer that is most appropriate*

- general practitioner and pharmacist together
- general practitioner or pharmacist
- general practitioner
- pharmacist
- hospital deployed medical specialist
- no one
- others, i.e. ....

4. **Did these people discuss the preparation of the PTAM during a pre-PTAM meeting discussion?**

- no, never
- yes, but for less than 50% of all PTAM meetings
- yes, for more than 50% of all PTAM meetings, but not for all
- yes, always

5. **Did you use prescribing feedback or benchmark data during PTAM meetings?**

- No, never
- yes, but in less than 50% of all PTAM meetings
- yes, in more than 50% of all PTAM meetings, but not in all
- yes, always

6. **Did the group reach agreement on preferred drugs during the PTAM meetings?**

- No, never (if so, this was the last question)
- Yes, on one clinical topic
- Yes, on two or more clinical topics
- Yes, always

7. **Were agreements on the prescribing of drugs recorded in a meeting report?**

- No, never
- Yes, some but not all agreements
- yes, all agreements were recorded in a report

8. **Were targets set by the group?**

- No, never
- yes, but in less than 50% of all PTAM meetings
- yes, in more than 50% of all PTAM meetings, but not in all
- yes, always

9. **Were the effects of the agreements on prescribing behaviour evaluated in another PTAM meeting?**

- yes
- no (if no, this was your last question)

**10. Were prescribing feedback or benchmark data used in this meeting?**

yes

no
